# Supplementary material for: Expression and Characterization of an Efficient Alginate Lyase from Psychromonas sp. SP041 through Metagenomics Analysis of Rotten Kelp
Source: MDPI journal article supplement (doi:10.3390/genes15050598), 2024-05-08
Supplement: s1 [file s1]

## Supplementary Materials

### Expression, purification and characterization of a new alginate lyase from *Psychromonas* sp. SP041 through metagenomics analysis of rotten kelp

Ping Wang<sup>1,2</sup>, Yi Cai<sup>3</sup>, Hua Zhong<sup>4</sup>, Ruiting Chen<sup>3</sup>, Yuetao Yi<sup>2</sup>, Yanrui Ye<sup>3,\*</sup>, Lili Li<sup>2,\*</sup>

<sup>1</sup>Shandong University of Traditional Chinese Medicine, Jinan, 250355, China; wangpingdoct@163.com

<sup>2</sup>Yantai Institute of Coastal Zone Research, Chinese Academy of Sciences, Yantai, 264003, China; [wangpingdoct@163.com](mailto:wangpingdoct@163.com); [ytyi@yic.ac.cn](mailto:ytyi@yic.ac.cn); [llli@yic.ac.cn](mailto:llli@yic.ac.cn)

<sup>3</sup>South China University of Technology, School of Biology and Biological Engineering, Guangzhou, 510006, China; [202110189261@mail.scut.edu.cn](mailto:202110189261@mail.scut.edu.cn); [202221049742@mail.scut.edu.cn](mailto:202221049742@mail.scut.edu.cn); [esyanruiye@scut.edu.cn](mailto:esyanruiye@scut.edu.cn)

<sup>4</sup>Binzhou Medical University, Yantai, 264003, China; [18279017719@163.com](mailto:18279017719@163.com)

\*Correspondence: [esyanruiye@scut.edu.cn](mailto:esyanruiye@scut.edu.cn); [llli@yic.ac.cn](mailto:llli@yic.ac.cn)

#### Content

Figure S1, S2 and S3

Table S1

Table S2

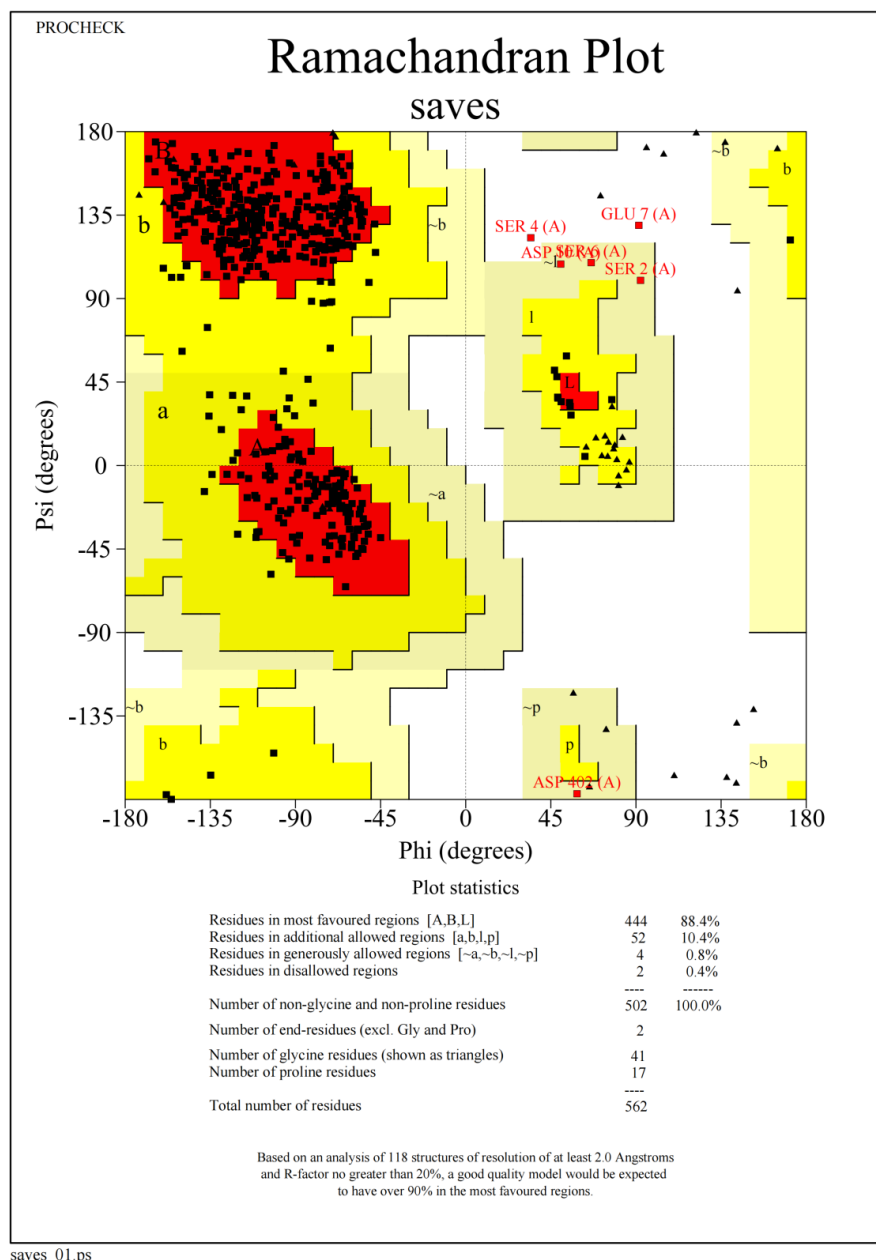

**Figure S1.** Ramachandran plot of the predicted protein structure of Alg169

Program: ERRAT2  
 File: relaxed\_model\_1\_pred\_0.pdb  
 Chain#:A  
 Overall quality factor\*\*: 96.449

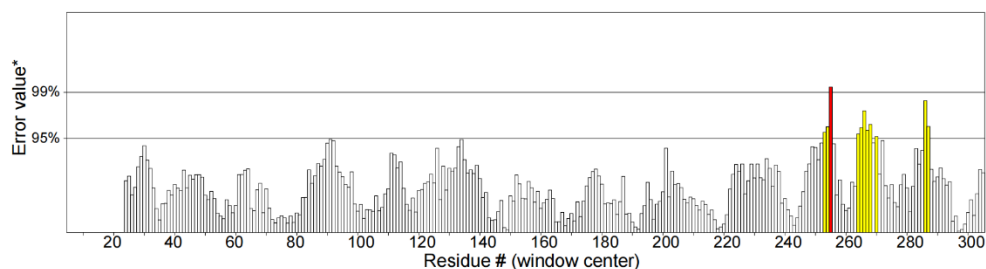

Program: ERRAT2  
 File: relaxed\_model\_1\_pred\_0.pdb  
 Chain#:A  
 Overall quality factor\*\*: 96.449

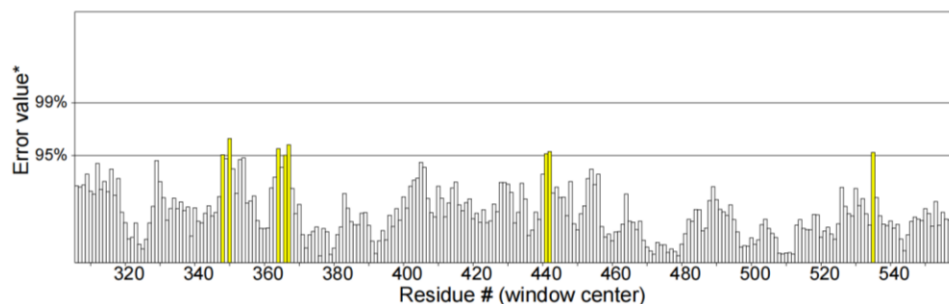

**Figure S2.** ERRAT detection results of Alg169 predicted protein structure

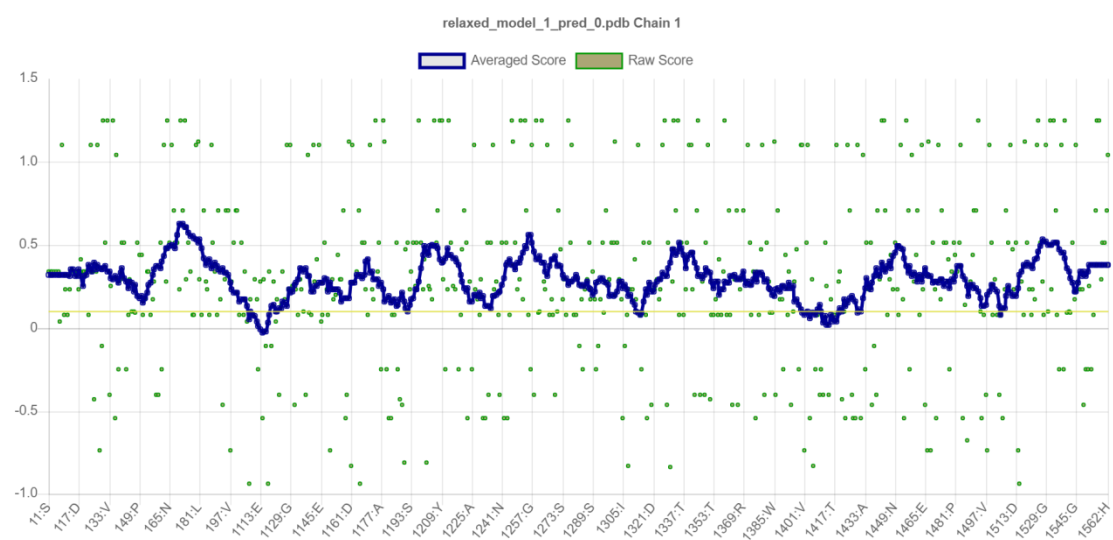

**Figure S3.** Verify3D detection results of Alg169 predicted protein structure

**Table S1.** Gene sequences of Alg169, Alg179, Alg189 and Alg136

| Gene name | Gene sequence                                                                                                                                                                                                                                                                                                                                                                                                                                                                                                                                                                                                                                                                                                                                                                                                                                                                                                                                                                                                                                                                                                                                                                                                                                                                                                                                                                                                                                                                                                                                                                                                                                                                                                                                                                                                                                                                                                                                        |
|-----------|------------------------------------------------------------------------------------------------------------------------------------------------------------------------------------------------------------------------------------------------------------------------------------------------------------------------------------------------------------------------------------------------------------------------------------------------------------------------------------------------------------------------------------------------------------------------------------------------------------------------------------------------------------------------------------------------------------------------------------------------------------------------------------------------------------------------------------------------------------------------------------------------------------------------------------------------------------------------------------------------------------------------------------------------------------------------------------------------------------------------------------------------------------------------------------------------------------------------------------------------------------------------------------------------------------------------------------------------------------------------------------------------------------------------------------------------------------------------------------------------------------------------------------------------------------------------------------------------------------------------------------------------------------------------------------------------------------------------------------------------------------------------------------------------------------------------------------------------------------------------------------------------------------------------------------------------------|
| Alg169    | <p>TCAAGCAGTTCATCCTCTGAAGGAACAGATACCGACTCCTCATCCTCTGACAACA<br/> GCTCGTCGACCGGTTTCCTACTCCGGCGTTCCGTATGATTATGTGCAATACATCCA<br/> CGCCCTGAACAATGCCAAGCTGCAGCAAAACAACCCTCCGACCTCCAGCAGCAC<br/> TTCAGAGGTGGTGGATGCTGGTGAGTACAACGGCTTTGACAACGACTACTTCTAC<br/> CTGGATAGCACCACGGGTTGGCTGACCTTCGAAATGACCGGTGACTCGAAACGT<br/> AGCGAGTTGCGCTTCGTAGAAAACCTTTCGTACCAACACCTCAGAGATCAGCACG<br/> CTTAGCGCGGAAATCTTACCGATTAGCCCGGAAGAAAGCGTTGCTAGCAGCGGT<br/> GATGGGCAAGAGATGACGCTTATGCAGGTTTCATAATAAAGGTGAGAATGGTGAA<br/> ACGGATGATACCGTTCTGTACATCCGCTGCTGCGTATTGTTTGGGATGGCGAGT<br/> CTCGTATCGATGACGACACCGGTGACTCCTACTCTAACGCGTATTGGGCAATTAT<br/> TAAGACGAATGCGTACGAATGTAAAGATGACAGCAACCCGAATTATAACGATAA<br/> CTGCCCCGATAGTTACGATTTCTACTACCTGGCAGATTACGACCAGGATAACGCG<br/> ACCAAGTTCGATATCGAAGCGGGTGACAGCACTCTGATTATCAACGTGGACGGT<br/> GATGAGAAGGTGAACATTGATATTACCTATTGGGATGACCTCTATAGCTACTTCA<br/> AGGCAGGCGTGTATAACCAGTACGAAGATGGTACCAGCACCGTTCAATTTAAGA<br/> GCCTGACGTACAACGGCACCAACCTGCCGTCCGCGGACCTCGACTCTTCTTCTGC<br/> GCCATCGGATAACTTCGAGTTGAATGATTGGAATCTGTCTATCCCGACGGACGAC<br/> GACAACCTCCGGTACCGCTGACACTATCGACGAGGATGACTTGAGTGACGGCTAC<br/> GAAGACTTCGAATATTTCTATACCAATACCGACGACGGCGGCATGGTTTTTTACG<br/> TGGAAGTCGACGGCTACAAAACCAGCACTAATACGAGCTATACCCGTACCGAGC<br/> TGCGCGAGATGCTGAGAGAAGGTGACACCTCGATTAGCACTAAGGGTGTCAATG<br/> AAAACAACCTGGGTCTTCAGCAGTGCCCCGACTTCCGAGCAGGAGAAGGCGGGCG<br/> GTGTGGACGGTATCCTGGACGCGACCGTTGCTGTGAATCAGGTGAGCACGACCG<br/> GCGAGAGCTATCAAATCGGCCGTGTTATCATTGGCCAAATCCACGCTAATGACG<br/> ACGAGCCGGTTTCGCTTGTATTACCGCAAACCTGCCGGACAACGATAAAGGTAGCA<br/> TCTATTTTCGCGCACGAACCGCGTACCGGCGATGAGGTCTGGGTGATATGATCGG<br/> TAGCCGTGATAATAACGCGTCCAACCCGAGCGACGGTATCGCGCTGGATGAGCC<br/> ATTTTTTTATCAAATTAAGTGTTGGTAATACTTTGACCGTGACCATTATGCGT<br/> GATGGCAAAGATGATGTTATTGAAACCTGGGACATGACGGATTCCGGCTATGAT<br/> GAGACAGGCCAGTACATGTATTTAAGGCGGGTGCCTACAACCAGAATAACAGC<br/> GGTGAAGACGATGAAGCGGCACAGGCTACCTTTTATTACTTGAATAACCGCCAT</p> |
| Alg179    | <p>CACGCTGATTATTTTTACCTAGACGATGAAGACCACCTGGTTTTTGTACCCCGAA<br/> CAAGGCGTTTACCACCCCGAACAGCTCTAATGCGCGTACGGAACTGCGTCAGATG<br/> TTGCGCGGCACTGACACCTCCATTGGTACGCATGATCCGCAGAATAACTTCGCCTT<br/> GGCGAGCCATAAACACGCAGACCAATACGCGCAGGTTGGCGGTTTTCTGGAAGCT<br/> ACCCTCCGCGTCGAGCACGTGGCGGAACGTAGCCGTAAGCCGGACCGCAAGTCC<br/> GCGTATTCGGTGGTGGTTGGTCAAATTCACGCCGGTAAAGATAAAGCTCTGATGG<br/> AAGAGGACGAGGGCTTCGGCCATGGCAACGAGCCGCTGAAAATCTTCTACAAA<br/> AGCTTCCGGATCAAGATACCGGTAGCGTGTTCTGGAATTATGAGAAGAACCTGGC</p>                                                                                                                                                                                                                                                                                                                                                                                                                                                                                                                                                                                                                                                                                                                                                                                                                                                                                                                                                                                                                                                                                                                                                                                                                                                                                                                                                                                                                                              |

GAAAGAAGACCCACGTCGTACCGACGTGAGCTACGCAGTTTGGGGTAATGATTGG  
TCATCTAACGCTGATCCGGGTGAAGAGGGCATCAGCCTG

Alg189 GCTCACTATCTACCCCCACCTGATTTTATAAGAACACCGCCGGCAGCGCGTGCGCA  
GCCGGCTGACTTCACCTGCCCGGCAGCTCCGGCGCCTTTCCGTGGCGAACTGGTT  
TTTCGTTCGAAATACGAGGGCTCTGACGCTGCGCGAGCGACCTTGAATAAAGAAG  
CACTCGCGGGCTACCGCCAGGCAACCCGCAACATCACGGCAACCCAAAAACGTG  
TTACCGCGCTCGCTGCTCGCTATGGTAAGGCGGGCGATAAACGCGTGGCGGACTG  
TCTGGTGAGCATGCTGTATGCCTGGGCGGTCCAGGATGCATTGACCAGCACCACC  
ACCTCACATAACCGGTAAGGCGGTTTCGTAAGTGGGCGCTGGCATCCTTTAGCTCCG  
CGTGGCTGCAATTGCAATTTGCCCCAGCCCAACCACTGAACGGCAACCCGCATAC  
CGCGGAAGTTGAGCGCTGGCTGTCTGCATTGGCGACCCTGACTGTCTCTGACTGG  
GCCGACCTGCCGCGTGAGAAGATTAACAACCACAGCTATTGGGCTGCGAGCGCCT  
TAATGACCACTGCGGTCTGTGACGGGTCGCGAGGATCTGTTCAACCGTGCGGTGGC  
GATGCTAAGGACGGCTCTTTCCCAGGTTGATGAGAATGGTTTTCTGCCGAATGAAT  
TAAAACGCAAAAGCCGTGCCCTGGCATAACACGATTACGCATTGCAACCGCTGGT  
GACTTTGGTGCGTTTCGCGAAAGCGAATCAGGTTCTGTCTGACGCCGGAGGAAAA  
CCGCGCGTTTGCCCGTCTGGTGGCTCGTGTACGTGCTGGTAAGGCCGACCCGGCA  
GCGTTTCGTGAAAAGACCGGCAGCGAACAGGAGCCGTTACCCCGAGCCCGCGT  
CCCTCCCCG

Alg136 ATGCTAACAAAAAAGACGCCCAATACTGTAACCTACGAACAGTTGCAAGGTGGCA  
GCGATTGCATGTAGCTTTGCCTTGCTGGGGTGCGTCTCTACGGTGGAACGATAC  
CACCGTCCTGGCGAAAGCGGACAGCCCGGCGTCGCAATTTGATTTACTCGGCTGG  
ACCATTTCTGTTCCGGTCGACTCCGACGGCAACGGCAAGTCCGATCAGATCAAAG  
AAAAGGCTCTGGCTGCCGTTATGCTGATCCGGAATACTTCTACTTGGCGGACGA  
CGGCGGCATGGTTTTTAAATCTCCGTTAAAGGCGCAAAAACGAGCAAAAACAC  
CAAGTACACCAGAAGCGAGCTGCGTGAAATGATCCGCCGTGGTAATACCTCCTAC  
AGCACCAAGGGCGTGGGTGGCAACAACCTGGGTTTTTCAGCACCGCACCGGCGGAA  
GATCTGAAAAATGCAGGCGGCGTGACGGCACCCCTGGAAGCGACCCTTGCTGTG  
AACCACGTTACCACCACTGGTGTGAATTGGCAGCAAGGTCGTGTTATTATCGGCC  
AAATCCACGCCAATGATGATGAACCGATTTCGCCTGTATTACCGCAAATTGCCACAA  
CATGAGAAGGGTAGCATTTACTTCGCGCATGAGCCGAACTCGGAGGCGGACGAG  
CAGTGGGTAGACATCATCGGTAACAGCCTGCCAACTATTGGAATAAGGACGCTA  
CACCGGCGGAGCCGGTCGACGGTATTAACTGGGTGAAAAATTCTCCTACCGTAT  
CAACGTGACGGGTCACGATTTGGCGGTGACTGTGATGCGTCCGGGTAAGCCGA  
CATACCAAGCACGTGGACATGAGCGAGAGCCGTTATGATGTTGGTGGTCAATATA  
TGTATTTCAAAGCGGGTGTTTATAACCAGAATAAGACCGGTGATGCGAAAGATTAC  
GTTTCAGGCAACCTTTTACGACCTGCAGGTTACGCAT

---

**Table S2.** Alg169 amplification and identification primers

| Primer name | Primer sequence                                                                 |
|-------------|---------------------------------------------------------------------------------|
| Alg169-1    | TTGTTTAACTTTAAGAAGGAGATATACATATGGCTAGCATGACTGGTGGAC<br>AGCAAATGGGTCGCGGATCCG    |
| Alg169-2    | GAGGATGAGGAGTCGGTATCTGTTCTTCAGAGGATGAACTGCTTGAGAAT<br>TCGGATCCGCGACCCATTTGC     |
| Alg169-3    | CCGACTCCTCATCCTCTGACAACAGCTCGTCGACCGGTTCTACTCCGGCGT<br>TCCGTATGATTATGT          |
| Alg169-4    | GAGGGTTGTTTTGCTGCAGCTTGGCATTGTTTCAGGGCGTGGATGTATTGCAC<br>ATAATCATACGGAAC        |
| Alg169-5    | GCAGCAAAACAACCCTCCGACCTCCAGCAGCACTTCAGAGGTGGTGGATGC<br>TGGTGAGTACAACGGCTTTGAC   |
| Alg169-6    | CGGTCATTTCGAAGGTCAGCCAACCCGTGGTGCTATCCAGGTAGAAGTAGT<br>CGTTGTCAAAGCCGTTGTACTCAC |
| Alg169-7    | TGACCTTCGAAATGACCGGTGACTCGAAACGTAGCGAGTTGCGCTTCGTAG<br>AAAACTTTCGTACCAACAC      |
| Alg169-8    | CTTCTCTCCGGGCTAATCGGTAAGATTTCCGCGCTAAGCGTGCTGATCTCTG<br>AGGTGTTGGTACGAAAGTTTTTC |
| Alg169-9    | TTAGCCCGGAAGAAAGCGTTGCTAGCAGCGGTGATGGGCAAGAGATGACG<br>CTTATGCAGGTTTATAATA       |
| Alg169-10   | CAATACGCAGCAGCGGATGTGACAGAACGGTATCATCCGTTTCACCATTCT<br>CACCTTTATTATGAACCTGCATAA |
| Alg169-11   | ATCCGCTGCTGCGTATTGTTTGGGATGGCGAGTCTCGTATCGATGACGACAC<br>CGGTGACTCCTACTCTAAC     |
| Alg169-12   | TCATCTTTACATTTCGTACGCATTTCGTCTTAATAATTGCCCAATACGCGTTAG<br>AGTAGGAGTCACCGG       |
| Alg169-13   | CGTACGAATGTAAAGATGACAGCAACCCGAATTATAACGATAACTGCCCCGG<br>ATAGTTACGATTTCTACTAC    |
| Alg169-14   | CCGCTTCGATATCGAACTTGGTCGCGTTATCCTGGTCGTAATCTGCCAGGTA<br>GTAGAAATCGTAACTAT       |
| Alg169-15   | CAAGTTCGATATCGAAGCGGGTGACAGCACTCTGATTATCAACGTGGACGG<br>TGATGAGAAGGTGAACATTGATA  |
| Alg169-16   | TCGTACTGGTTATACACGCCTGCCTTGAAGTAGCTATAGAGGTCATCCCAAT<br>AGGTAATATCAATGTTTACCTT  |
| Alg169-17   | TGTATAACCAGTACGAAGATGGTACCAGCACCGTTCAATTTAAGAGCCTGA<br>CGTACAACGGCACCACCTT      |
| Alg169-18   | ATTCAACTCGAAGTTATCCGATGGCGCAGAAGAAGAGTCGAGGTCCGCGGA<br>CGGCAGGGTGGTGCCGTTGT     |
| Alg169-19   | TAACCTTCGAGTTGAATGATTGGAATCTGTCTATCCCGACGGACGACGACAA<br>CTCCGGTACCGCTGACACTATCG |
| Alg169-20   | TTGGTATAGAAATATTCGAAGTCTTCGTAGCCGTCACTCAAGTCATCCTCGT                            |
